# Supplementary material for: A PET Imaging Strategy for Interrogating Target Engagement and Oncogene Status in Pancreatic Cancer
Source: Oxford University Press journal article supplement (doi:10.1158/1078-0432.ccr-18-1485), 2018-09-18
Supplement: 10780432ccr181485-sup-201706_2_supp_5021716_prv2rr.docx [file 10780432ccr181485-sup-201706_2_supp_5021716_prv2rr.docx]

**Title:** A PET Imaging Strategy for Interrogating Target Engagement and Oncogene Status in Pancreatic Cancer

**Authors and Affiliations**: Kelly E. Henry,1 Megan M. Dacek,2,3 Thomas R. Dilling,1 Jonathan D. Caen,1 Ian L. Fox,1 Michael J. Evans,4 Jason S. Lewis1,2,3,5,6*

1Department of Radiology, Memorial Sloan Kettering Cancer Center, New York, NY

2Program of Molecular Pharmacology and Chemistry, Memorial Sloan Kettering Cancer Center, New York, NY

3Department of Pharmacology, Weill Cornell Medical College, New York, NY

4Departments of Radiology and Biomedical Imaging, and Pharmaceutical Chemistry, University of California, San Francisco, San Francisco, CA

5Department of Radiology, Weill Cornell Medical College, New York, NY

6Radiochemistry and Molecular Imaging Probes Core, Memorial Sloan Kettering Cancer Center, New York, NY

**Running Title**: Imaging KRAS and MYC Signaling in Pancreatic Cancer

**Keywords**: transferrin, MYC, KRAS, zirconium-89, PET

**Corresponding author**: Jason S. Lewis, 1275 York Avenue, New York, NY 10065. P: 646-888-3038, F: 646-888-3059, email: lewisj2@mskcc.org

**SUPPLEMENTAL DATA**

**Cell cycle analysis.** A flow cytometry assay using 5-ethynyl-2'-deoxyuridine (EdU) incorporation was performed to confirm the antiproliferative effects of small molecule inhibitors in PDAC cells and determine the point of cellular arrest. PDAC cells were seeded in 6-well plates (5 × 105) and incubated at 37 °C with 5% CO2 in a humidified atmosphere overnight. Cells were incubated with fresh media, media with 1 μM drug (JQ1, OTX015, or SCH772984), or media with vehicle control (DMSO) for 24 h (BRD4 inhibitors) or 96 h (ERK inhibitor). Post-drugging, EdU (10 μM) was added directly to the cells (without disruption) and incubated for 1 h at 37 °C. Cells were immediately harvested and washed twice with cold PBS and incubated with Fixable Live/Dead viability dye (488 nm excitable) which can withstand the fixing process required for this protocol. Cells were then subjected to the Click It EdU System Protocol™ for staining with AlexaFluor647 (AF647). The AF647 staining combined with 4',6-diamidino-2-phenylindole (DAPI, 3.6 μM) was used to resolve cell cycle phases in a given population into G0/G1, S, and G2/M phase. Non-viable cells were gated out with the 488 nm excitable Fixable Live/Dead viability stain and data was analyzed by FlowJo software and plotted using GraphPad (PRISM).

**Protein analysis and western blot**. PDAC cells were plated in 100 mm culture dishes at 3 × 106 cells/dish. Cells were incubated with fresh media with vehicle (DMSO) or drug (1 μM of JQ1, OTX015, or SCH772984) and incubated for multiple time points. Cells were harvested and chemically lysed with RIPA buffer with protease inhibitor cocktail and phosphatase inhibitors (EMD Millipore, 1:100 dilution for each inhibitor). Cells were then subjected to mechanical lysis via sonication pulses at 4 °C (10 s on, 10 s off) for 5 min. Cell debris was then pelleted via centrifugation at 20,000 × g. Supernatant was analyzed for total protein content using a Lowry assay with a BSA standard curve. Lysates were prepared at 2 mg/mL total protein content with 4× SDS-PAGE loading dye, boiled for 5 min at 95 °C, and stored at -20 °C until further use. Samples were loaded onto 7% tris-acetate gels and underwent semi-dry transfer to nitrocellulose membranes via iBlot (Thermo Fisher Scientific). Membranes were blocked in 5% bovine serum albumin (BSA) in tris-buffered saline (TBS) buffer, pH 7.4, with 0.1% tween for 1 h at room temperature. Blots were then incubated overnight with primary antibodies (anti-MYC: Cell Signaling, clone # D84C12, 500:1 dilution; anti-CD71: Cell Signaling, clone # D7S5Z, 1000:1 dilution; anti-phospho-ERK, Cell Signaling, clone # 9101, 1000:1 dilution; anti-β-actin, Sigma-Aldrich, clone # AC-15, 20,000:1 dilution, anti-GAPDH, Cell Signaling clone # 14C10, 5,000:1 dilution) at 4 °C in blocking solution. Blots were incubated with HRP-conjugated secondary antibodies (anti-mouse, abcam cat # ab6789, 7500:1 dilution; anti-rabbit, abcam cat # ab6721, 5000:1 dilution) for 1 h at RT. Detection of bands was achieved with ECL signal substrate (GE Healthcare) and subsequent exposure onto X-ray film.

**Flow cytometry**. Flow cytometry using a phycoerythrin (PE) labeled anti-CD71 (TfR) antibody (human clone # CY1G4) was used to assess surface TfR protein levels pre- and post-drug treatment with BRD4, ERK, and MEK inhibitors in PDAC cells. Cells were plated in 6-well plates at 3 × 105/mL, allowed to adhere overnight, and incubated with fresh media with vehicle (DMSO) or drug (1 μM of JQ1, OTX015, or SCH772984) for 48 h. For the KRAS-WT vs. KRAS-mutant experiment, cells (BxPC-3 and MIA PaCa-2) were seeded as described above and drugged with a dose escalation of 250, 500, and 1000 nM with ERK inhibitor (SCH772984) or 25, 50, 100 nM of MEK inhibitor (trametinib) and incubated for 48 h. Post-incubation, cells were washed once with PBS, trypsinized, and centrifuged to collect pellets. The cells were resuspended in Fc receptor blocking solution (Miltenyi Biotec, 10 μL/1 M cells) for 30 min to prepare for surface antigen staining (TfR, 3 μL/1 M cells, 30 min incubation), and analyzed via flow cytometry. DAPI (4',6-diamidino-2-phenylindole) was used as a viability marker for surface staining experiments (3.6 μM). A PE-labeled IgG (clone # MOPC-173 for human IgG) was used as isotype controls at the same concentration of experimental dosing and incubation times to confirm specificity. For murine cells, the same protocol was used with anti-mouse CD71-PE antibody (clone #RI7217), mouse Fc receptor block, and Rat IgG2b, κ as an isotype control.

For flow cytometry using anti-MYC antibody, a LIVE/DEAD Fixable Dead Cell Stain (Thermo-Scientific) was used as the viability marker (1 μL/1 M cells). Cells were plated in 6-well plates at 3 × 105/mL and allowed to adhere overnight. Post-incubation, cells were washed once with PBS, trypsinized, and centrifuged to collect pellets. The cells were then stained with LIVE/DEAD Fixable Dead Cell Stain (Near-IR) for 10 min at 4 °C, which can withstand the fixation process. After this incubation, the cells were washed twice with ice-cold PBS, and resuspended in Fc receptor blocking solution (Miltenyi Biotec) for 30 min to prepare for surface antigen (TfR) staining as described above, then proceeded intracellular staining. Cells were fixed in a 4% paraformaldehyde solution on ice for 10 min, and subsequently incubated with anti-MYC AlexaFluor 488 conjugate (clone # D84C12) in saponin-based permeabilization buffer (5 μL antibody/1 M cells in 100 μL total permeabilization buffer for 30 min) and analyzed via flow cytometry. The anti-MYC conjugates targets both human and mouse antigen, so the same antibody was used for both cell species. A concentration-matched Rabbit (DA1E) mAb IgG XP® Isotype Control (Alexa Fluor® 488 Conjugate) #2975 was used as a control.

**Preparation and radiolabeling of [89Zr]Zr-transferrin**. [89Zr]Zr-oxalate (37 MBq) was neutralized to pH 7.0–7.2 with 2 M K2CO3. The DFO-Tf was added (70 μg) and the reaction was incubated at 37 °C for 1 h. A 2× stoichiometric excess of iron (III) chloride solution was added to facilitate the apo to holo exchange prior to purification. Subsequent purification was conducted using a PD10 desalting column with PBS. Purity and radiolabeling yields were quantified through iTLC with a 50 mM EDTA (pH 5) mobile phase (Supplemental Figure 1). Radiochemical yield for each experiment ranged from 60-70% and radiochemical purity was >99% for all experiments. Specific activity of [89Zr]Zr-Tf ranged from 3-5 MBq/nmol.

**Biodistribution studies.** Biodistribution studies were performed to measure the uptake of the radioconjugate in tumor and other tissues at 48 h. Mice were euthanized by asphyxiation with CO2 and blood was collected immediately via cardiac puncture while the tumor and other tissues were harvested. The masses of each tissue were recorded and the radioactivity bound to each organ was counted using a Perkin Elmer γ-counter with isotope-dependent calibrated protocols. The percentage of tracer uptake expressed as percentage injected dose per gram (% ID/g) was calculated as the activity bound to the tissue per organ mass per actual mass of injected dose decay-corrected to the time of counting.

**SUPPLEMENTAL FIGURE 1**: Radiolabeling of [89Zr]Zr-transferrin as shown by instant thin layer chromatography. Radiochemical yield ranged from 60-70% and all radiochemical purity was >99%.

**SUPPLEMENTAL FIGURE 2**: Protein analysis of drug treatment with BRD4 and ERK inhibitors in human PDAC cells via western blot. Western blot analysis of TfR and pERK post-treatment with SCH772984 (indicated as +) vs. Vehicle (indicated as -) at 4 h (**A**) and 24 h (**B**). (**C**) Western blot analysis of TfR and MYC protein expression post-treatment (48 h) with BRD4 inhibitors in human PDAC cells. (**D)** Western blot analysis of MYC upon treatment with BRD4 inhibitors in murine cells at 48 h. Abbreviations are as follows: M: MIA PaCa-2; S: Suit-2; B: BxPC-3; C: Capan-2; V: Vehicle; J: JQ1; O: OTX015. All vehicle and drug concentrations were 1 μM, and time points are indicated with each sub legend. All of the lysates were prepared at a stock concentration of 1-2 mg/mL using Lowry protein quantitation assay, and 10 total μg of protein was loaded for each sample.

**SUPPLEMENTAL FIGURE 3**: Ex vivo immunohistochemistry of resected murine iKras*p53* tumors. Expression of MYC and TfR is more abundant in KRAS-WT (4292, 9805, and 4668) tumors, with less amplification of MYC and TfR in KRAS-mutant tumors (4292*, 9805*, and 4668*). Specific TfR uptake is demonstrated by the blocking and IgG controls on subsequent sections. For each staining selection, *n* = 3 tumors, with 2-3 levels each were analyzed, and representative images from the same level of tumor from subsequent sections were chosen for figure representation. The scale for each section is 2000 μm and is represented in the left panel only for brevity.

**SUPPLEMENTAL FIGURE 4**: Dosing regimen for BRD4 and ERK inhibitors (indicated as “drug” in the scheme) over the course of 7 days, with a total of 12 doses, 12 hours apart. The timeline of [89Zr]Zr-transferrin radiotracer administration is indicated on day 5, with PET imaging and biodistribution on day 7, 48 h post-injection with the radiotracer.

**SUPPLEMENTAL FIGURE 5**: Ex vivo immunohistochemistry of resected human PDAC tumors pre and post-treatment with JQ1. Differences in MYC and TfR protein expression can be observed in tumors that responded to JQ1 treatment with regards to [89Zr]Zr-transferrin uptake in vivo. Specific TfR uptake is demonstrated by the blocking and IgG controls on subsequent sections. For each staining selection, *n* = 3 tumors, with 2-3 levels each were analyzed, and representative images from the same level of tumor from subsequent sections were chosen for figure representation. The scale for each section is 2000 μm and is represented in the left panel only for brevity.

**SUPPLEMENTAL FIGURE 6**: PET imaging of [89Zr]Zr-Transferrin uptake in vehicle vs. SCH772984-treated animals bearing BxPC-3 (KRAS-WT) xenografts. (**A**) Coronal PET slices of [89Zr]Zr-Tf uptake in vehicle and SCH772984-treated animals and (**B**) corresponding biodistribution *P < 0.05, **P < 0.01, ***P < 0.001. (**C**) Tumor measurements at experimental endpoint. Mice were treated with vehicle or SCH772984 at 50 mg/kg, twice daily, for 12 doses total. Tumors were measured and randomized at the start of each experiment. No significant difference was noted in tumor size at the end of the experiment between vehicle and drug treatment.
